# Supplementary material
Source: Springer Nature journal article supplement (https://www.springermedizin.de/resource/supplementary/13031_2014_146_MOESM1_ESM.pdf/9645222)
Supplement: MOESM1 [file 9645222]

# Implementing Organizations

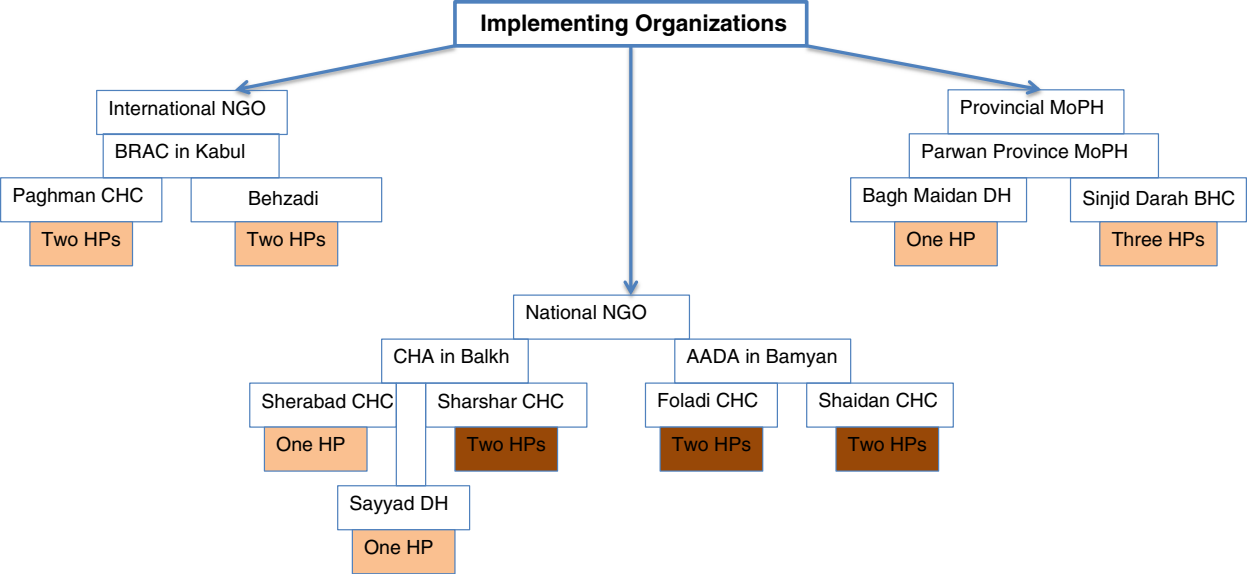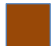

Extremely Remote: Between 2 to 4 hours drive from a provincial hospital

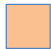

Remote: Around 1 hour drive from a provincial hospital
